# Supplementary material for: Age and Chronodisruption in Mouse Heart: Effect of the NLRP3 Inflammasome and Melatonin Therapy
Source: MDPI journal article supplement (doi:10.3390/ijms23126846), 2022-06-20
Supplement: s1 [file s1]

**Supplementary Table S1.** Aging, genotype, melatonin effect on clock gene expression in WT and NLRP3<sup>-/-</sup> mice. Significant differences determined by *Tukey multiple comparison of mean* post-hoc test after Multifactorial-ANOVA.

| Table S1.1. TRANSCRIPT: <i>Clock</i> . Post-hoc test: Tukey multiple comparison of mean |            |         |                        |                                                    |         |                               |                |         |                                                |                                                          |         |
|-----------------------------------------------------------------------------------------|------------|---------|------------------------|----------------------------------------------------|---------|-------------------------------|----------------|---------|------------------------------------------------|----------------------------------------------------------|---------|
| <u>Aging effect on WT</u>                                                               |            |         | <u>Genotype effect</u> |                                                    |         | <u>Melatonin effect on WT</u> |                |         | <u>Melatonin effect on NLRP3<sup>-/-</sup></u> |                                                          |         |
| Hour                                                                                    | Comparison | P value | Hour                   | Comparison                                         | P value | Hour                          | Comparison     | P value | Hour                                           | Comparison                                               | P value |
| 0                                                                                       | Y vs OA    | <0.05   | 0                      | NLRP3 <sup>-/-</sup> Y vs NLRP3 <sup>-/-</sup> EA  | <0.05   | 0                             | Y vs OA + aMT  | <0.05   | 0                                              | NLRP3 <sup>-/-</sup> Y vs NLRP3 <sup>-/-</sup> OA + aMT  | <0.05   |
|                                                                                         | EA vs OA   | <0.05   |                        | NLRP3 <sup>-/-</sup> Y vs NLRP3 <sup>-/-</sup> OA  | <0.05   | 6                             | Y vs OA + aMT  | <0.05   |                                                | NLRP3 <sup>-/-</sup> EA vs NLRP3 <sup>-/-</sup> EA + aMT | <0.05   |
| 6                                                                                       | Y vs EA    | <0.05   |                        | NLRP3 <sup>-/-</sup> EA vs NLRP3 <sup>-/-</sup> OA | <0.05   |                               | EA vs EA + aMT | <0.05   |                                                | NLRP3 <sup>-/-</sup> OA vs NLRP3 <sup>-/-</sup> OA + aMT | <0.05   |
|                                                                                         | Y vs OA    | <0.05   |                        | WT EA vs NLRP3 <sup>-/-</sup> EA                   | <0.05   | 12                            | Y vs OA + aMT  | <0.05   |                                                | WT EA + aMT vs NLRP3 <sup>-/-</sup> EA + aMT             | <0.05   |
|                                                                                         | EA vs OA   | <0.05   |                        | WT OA vs NLRP3 <sup>-/-</sup> OA                   | <0.05   |                               | OA vs OA + aMT | <0.05   | 6                                              | WT OA + aMT vs NLRP3 <sup>-/-</sup> OA + aMT             | <0.05   |
| 12                                                                                      | EA vs OA   | <0.05   | 6                      | NLRP3 <sup>-/-</sup> Y vs NLRP3 <sup>-/-</sup> OA  | <0.05   | 18                            | Y vs EA + aMT  | <0.05   | 18                                             | NLRP3 <sup>-/-</sup> Y vs NLRP3 <sup>-/-</sup> EA + aMT  | <0.05   |
| 18                                                                                      | Y vs OA    | <0.05   |                        | NLRP3 <sup>-/-</sup> EA vs NLRP3 <sup>-/-</sup> OA | <0.05   |                               | Y vs OA + aMT  | <0.05   |                                                | NLRP3 <sup>-/-</sup> Y vs NLRP3 <sup>-/-</sup> OA + aMT  | <0.05   |
|                                                                                         | EA vs OA   | <0.05   |                        | WT EA vs NLRP3 <sup>-/-</sup> EA                   | <0.05   |                               | EA vs EA + aMT | <0.05   |                                                | WT EA + aMT vs NLRP3 <sup>-/-</sup> EA + aMT             | <0.05   |
|                                                                                         |            |         | 12                     | NLRP3 <sup>-/-</sup> Y vs NLRP3 <sup>-/-</sup> EA  | <0.05   |                               | OA vs OA + aMT | <0.05   |                                                |                                                          |         |
|                                                                                         |            |         |                        | NLRP3 <sup>-/-</sup> EA vs NLRP3 <sup>-/-</sup> OA | <0.05   |                               |                |         |                                                |                                                          |         |
|                                                                                         |            |         | 18                     | NLRP3 <sup>-/-</sup> Y vs NLRP3 <sup>-/-</sup> EA  | <0.05   |                               |                |         |                                                |                                                          |         |
|                                                                                         |            |         |                        | NLRP3 <sup>-/-</sup> Y vs NLRP3 <sup>-/-</sup> OA  | <0.05   |                               |                |         |                                                |                                                          |         |
|                                                                                         |            |         |                        | NLRP3 <sup>-/-</sup> EA vs NLRP3 <sup>-/-</sup> OA | <0.05   |                               |                |         |                                                |                                                          |         |

Table S1.2. TRANSCRIPT: *Bmall*. Post-hoc test: Tukey multiple comparison of mean

| <u><i>Aging effect on WT</i></u> |            |         | <u><i>Genotype effect</i></u> |                                                    |         | <u><i>Melatonin effect on WT</i></u> |                      |         | <u><i>Melatonin effect on NLRP3<sup>-/-</sup></i></u> |                                                          |         |
|----------------------------------|------------|---------|-------------------------------|----------------------------------------------------|---------|--------------------------------------|----------------------|---------|-------------------------------------------------------|----------------------------------------------------------|---------|
| Hour                             | Comparison | P value | Hour                          | Comparison                                         | P value | Hour                                 | Comparison           | P value | Hour                                                  | Comparison                                               | P value |
| 0                                | Y vs EA    | <0.001  | 0                             | NLRP3 <sup>-/-</sup> Y vs NLRP3 <sup>-/-</sup> EA  | <0.001  | 0                                    | Y vs EA + aMT        | <0.001  | 0                                                     | NLRP3 <sup>-/-</sup> Y vs NLRP3 <sup>-/-</sup> OA + aMT  | <0.001  |
|                                  | Y vs OA    | <0.001  |                               | NLRP3 <sup>-/-</sup> Y vs NLRP3 <sup>-/-</sup> OA  | <0.001  |                                      | Y vs OA + aMT        | <0.001  |                                                       | WT EA + aMT vs NLRP3 <sup>-/-</sup> EA + aMT             | <0.001  |
| 6                                | Y vs EA    | <0.001  | 6                             | WT Y vs NLRP3 <sup>-/-</sup> Y                     | <0.01   | 6                                    | Y vs EA + aMT        | <0.05   | 12                                                    | NLRP3 <sup>-/-</sup> Y vs NLRP3 <sup>-/-</sup> OA + aMT  | <0.001  |
|                                  | EA vs OA   | <0.05   | 12                            | NLRP3 <sup>-/-</sup> EA vs NLRP3 <sup>-/-</sup> OA | <0.05   |                                      | Y vs OA + aMT        | <0.05   |                                                       | NLRP3 <sup>-/-</sup> OA vs NLRP3 <sup>-/-</sup> OA + aMT | <0.001  |
| 18                               | Y vs EA    | <0.001  | 18                            | NLRP3 <sup>-/-</sup> Y vs NLRP3 <sup>-/-</sup> EA  | <0.001  | 18                                   | Y vs EA + aMT        | <0.001  | 18                                                    | NLRP3 <sup>-/-</sup> Y vs NLRP3 <sup>-/-</sup> EA + aMT  | <0.05   |
|                                  | Y vs OA    | <0.001  |                               | NLRP3 <sup>-/-</sup> Y vs NLRP3 <sup>-/-</sup> OA  | <0.001  |                                      | Y vs OA + aMT        | <0.001  |                                                       | NLRP3 <sup>-/-</sup> Y vs NLRP3 <sup>-/-</sup> OA + aMT  | <0.001  |
|                                  |            |         |                               | WT Y vs NLRP3 <sup>-/-</sup> Y                     | <0.001  |                                      | EA vs EA+aMT         | <0.001  |                                                       | WT EA + aMT vs NLRP3 <sup>-/-</sup> EA + aMT             | <0.001  |
|                                  |            |         |                               |                                                    |         |                                      | EA + aMT vs OA       | <0.001  |                                                       |                                                          |         |
|                                  |            |         |                               |                                                    |         |                                      | EA + aMT vs OA + aMT | <0.001  |                                                       |                                                          |         |
|                                  |            |         |                               |                                                    |         |                                      |                      |         |                                                       |                                                          |         |

**Table S1.3. TRANSCRIPT: *Per2*. Post-hoc test: Tukey multiple comparison of mean**

| <i>Aging effect on WT</i> |            |         | <i>Genotype effect</i> |                                                    |         | <i>Melatonin effect on WT</i> |                |         | <i>Melatonin effect on NLRP3<sup>-/-</sup></i> |                                                          |         |
|---------------------------|------------|---------|------------------------|----------------------------------------------------|---------|-------------------------------|----------------|---------|------------------------------------------------|----------------------------------------------------------|---------|
| Hour                      | Comparison | P value | Hour                   | Comparison                                         | P value | Hour                          | Comparison     | P value | Hour                                           | Comparison                                               | P value |
| 0                         | Y vs EA    | <0.05   | 0                      | NLRP3 <sup>-/-</sup> Y vs NLRP3 <sup>-/-</sup> OA  | <0.05   | 6                             | Y vs EA + aMT  | <0.05   | 0                                              | NLRP3 <sup>-/-</sup> Y vs NLRP3 <sup>-/-</sup> EA + aMT  | <0.05   |
|                           | EA vs OA   | <0.05   |                        | NLRP3 <sup>-/-</sup> EA vs NLRP3 <sup>-/-</sup> OA | <0.05   |                               | OA vs OA + aMT | <0.05   |                                                | NLRP3 <sup>-/-</sup> EA vs NLRP3 <sup>-/-</sup> EA + aMT | <0.05   |
| 6                         | Y vs OA    | <0.05   |                        | WT EA vs NLRP3 <sup>-/-</sup> EA                   | <0.05   | 12                            | Y vs EA + aMT  | <0.05   |                                                | NLRP3 <sup>-/-</sup> OA vs NLRP3 <sup>-/-</sup> OA + aMT | <0.05   |
|                           | EA vs OA   | <0.05   |                        | WT OA vs NLRP3 <sup>-/-</sup> OA                   | <0.05   |                               | EA vs EA + aMT | <0.05   | 6                                              | NLRP3 <sup>-/-</sup> Y vs NLRP3 <sup>-/-</sup> EA + aMT  | <0.05   |
| 18                        | Y vs EA    | <0.05   | 6                      | NLRP3 <sup>-/-</sup> Y vs NLRP3 <sup>-/-</sup> EA  | <0.05   | 18                            | Y vs EA + aMT  | <0.05   |                                                | WT OA + aMT vs NLRP3 <sup>-/-</sup> OA + aMT             | <0.05   |
|                           | Y vs OA    | <0.05   |                        | NLRP3 <sup>-/-</sup> EA vs NLRP3 <sup>-/-</sup> OA | <0.05   |                               | Y vs OA + aMT  | <0.05   | 12                                             | NLRP3 <sup>-/-</sup> EA vs NLRP3 <sup>-/-</sup> EA + aMT | <0.05   |
|                           | EA vs OA   | <0.05   |                        | WT EA vs NLRP3 <sup>-/-</sup> EA                   | <0.05   |                               | EA vs EA + aMT | <0.05   |                                                | NLRP3 <sup>-/-</sup> OA vs NLRP3 <sup>-/-</sup> OA + aMT | <0.05   |
|                           |            |         | 12                     | NLRP3 <sup>-/-</sup> Y vs NLRP3 <sup>-/-</sup> EA  | <0.05   |                               | OA vs OA + aMT | <0.05   |                                                | WT Y vs NLRP3 <sup>-/-</sup> Y                           | <0.05   |
|                           |            |         |                        | NLRP3 <sup>-/-</sup> Y vs NLRP3 <sup>-/-</sup> OA  | <0.05   |                               |                |         |                                                | WT EA vs NLRP3 <sup>-/-</sup> EA                         | <0.05   |
|                           |            |         | 18                     | NLRP3 <sup>-/-</sup> Y vs NLRP3 <sup>-/-</sup> OA  | <0.05   |                               |                |         |                                                | WT OA vs NLRP3 <sup>-/-</sup> OA                         | <0.05   |
|                           |            |         |                        | NLRP3 <sup>-/-</sup> EA vs NLRP3 <sup>-/-</sup> OA | <0.05   |                               |                |         |                                                | WT EA + aMT vs NLRP3 <sup>-/-</sup> EA + aMT             | <0.05   |
|                           |            |         |                        | WT Y vs NLRP3 <sup>-/-</sup> Y                     | <0.05   |                               |                |         |                                                | WT OA + aMT vs NLRP3 <sup>-/-</sup> OA + aMT             | <0.05   |
|                           |            |         |                        | WT EA vs NLRP3 <sup>-/-</sup> EA                   | <0.05   |                               |                |         | 18                                             | NLRP3 <sup>-/-</sup> Y vs NLRP3 <sup>-/-</sup> EA + aMT  | <0.05   |
|                           |            |         |                        | WT OA vs NLRP3 <sup>-/-</sup> OA                   | <0.05   |                               |                |         |                                                | NLRP3 <sup>-/-</sup> OA vs NLRP3 <sup>-/-</sup> OA + aMT | <0.05   |
|                           |            |         |                        |                                                    |         |                               |                |         |                                                | WT EA + aMT vs NLRP3 <sup>-/-</sup> EA + aMT             | <0.05   |
|                           |            |         |                        |                                                    |         |                               |                |         |                                                | WT OA + aMT vs NLRP3 <sup>-/-</sup> OA + aMT             | <0.05   |

**Table S1.4. TRANSCRIPT: *Chrono*. Post-hoc test: Tukey multiple comparison of mean**

| Aging effect on WT                             |                                                          |         |
|------------------------------------------------|----------------------------------------------------------|---------|
| Hour                                           | Comparison                                               | P value |
| 6                                              | Y vs EA                                                  | <0.05   |
|                                                | Y vs OA                                                  | <0.05   |
|                                                | EA vs OA                                                 | <0.05   |
| 12                                             | Y vs EA                                                  | <0.05   |
|                                                | Y vs OA                                                  | <0.05   |
|                                                | EA vs OA                                                 | <0.05   |
| 18                                             | Y vs OA                                                  | <0.05   |
|                                                | EA vs OA                                                 | <0.05   |
|                                                |                                                          |         |
|                                                |                                                          |         |
|                                                |                                                          |         |
|                                                |                                                          |         |
|                                                |                                                          |         |
|                                                |                                                          |         |
|                                                |                                                          |         |
|                                                |                                                          |         |
| <u>Genotype effect</u>                         |                                                          |         |
| Hour                                           | Comparison                                               | P value |
| 0                                              | NLRP3 <sup>-/-</sup> Y vs NLRP3 <sup>-/-</sup> EA        | <0.05   |
|                                                | NLRP3 <sup>-/-</sup> Y vs NLRP3 <sup>-/-</sup> OA        | <0.05   |
|                                                | WT Y vs NLRP3 <sup>-/-</sup> Y                           | <0.05   |
|                                                | WT EA vs NLRP3 <sup>-/-</sup> EA                         | <0.05   |
|                                                | WT OA vs NLRP3 <sup>-/-</sup> OA                         | <0.05   |
|                                                |                                                          |         |
| 6                                              | NLRP3 <sup>-/-</sup> Y vs NLRP3 <sup>-/-</sup> EA        | <0.05   |
|                                                | NLRP3 <sup>-/-</sup> Y vs NLRP3 <sup>-/-</sup> OA        | <0.05   |
|                                                | WT EA vs NLRP3 <sup>-/-</sup> EA                         | <0.05   |
|                                                | WT OA vs NLRP3 <sup>-/-</sup> OA                         | <0.05   |
|                                                |                                                          |         |
|                                                |                                                          |         |
| 12                                             | NLRP3 <sup>-/-</sup> Y vs NLRP3 <sup>-/-</sup> EA        | <0.05   |
|                                                | NLRP3 <sup>-/-</sup> Y vs NLRP3 <sup>-/-</sup> OA        | <0.05   |
|                                                | WT Y vs NLRP3 <sup>-/-</sup> Y                           | <0.05   |
|                                                | WT EA vs NLRP3 <sup>-/-</sup> EA                         | <0.05   |
|                                                | WT OA vs NLRP3 <sup>-/-</sup> OA                         | <0.05   |
|                                                |                                                          |         |
| 18                                             |                                                          |         |
|                                                |                                                          |         |
|                                                |                                                          |         |
|                                                |                                                          |         |
| <u>Melatonin effect on WT</u>                  |                                                          |         |
| Hour                                           | Comparison                                               | P value |
| 0                                              | Y vs EA + aMT                                            | <0.05   |
|                                                | Y vs OA + aMT                                            | <0.05   |
|                                                | EA vs EA + aMT                                           | <0.05   |
|                                                | OA vs OA + aMT                                           | <0.05   |
|                                                | Y vs EA + aMT                                            | <0.05   |
|                                                | Y vs OA + aMT                                            | <0.05   |
| 6                                              | EA vs EA + aMT                                           | <0.05   |
|                                                |                                                          |         |
| 12                                             | Y vs EA + aMT                                            | <0.05   |
|                                                | Y vs OA + aMT                                            | <0.05   |
|                                                | EA vs EA + aMT                                           | <0.05   |
|                                                | OA vs OA + aMT                                           | <0.05   |
|                                                |                                                          |         |
|                                                |                                                          |         |
| 18                                             | Y vs EA + aMT                                            | <0.05   |
|                                                | Y vs OA + aMT                                            | <0.05   |
|                                                | EA vs EA + aMT                                           | <0.05   |
|                                                |                                                          |         |
| <u>Melatonin effect on NLRP3<sup>-/-</sup></u> |                                                          |         |
| Hour                                           | Comparison                                               | P value |
| 0                                              | NLRP3 <sup>-/-</sup> Y vs NLRP3 <sup>-/-</sup> EA + aMT  | <0.05   |
|                                                | NLRP3 <sup>-/-</sup> Y vs NLRP3 <sup>-/-</sup> OA + aMT  | <0.05   |
|                                                | NLRP3 <sup>-/-</sup> EA vs NLRP3 <sup>-/-</sup> EA + aMT | <0.05   |
|                                                | NLRP3 <sup>-/-</sup> OA vs NLRP3 <sup>-/-</sup> OA + aMT | <0.05   |
|                                                | WT EA + aMT vs NLRP3 <sup>-/-</sup> EA + aMT             | <0.05   |
|                                                | WT OA + aMT vs NLRP3 <sup>-/-</sup> OA + aMT             | <0.05   |
| 6                                              | NLRP3 <sup>-/-</sup> Y vs NLRP3 <sup>-/-</sup> EA + aMT  | <0.05   |
|                                                | NLRP3 <sup>-/-</sup> Y vs NLRP3 <sup>-/-</sup> OA + aMT  | <0.05   |
|                                                | NLRP3 <sup>-/-</sup> EA vs NLRP3 <sup>-/-</sup> EA + aMT | <0.05   |
|                                                | NLRP3 <sup>-/-</sup> Y vs NLRP3 <sup>-/-</sup> EA + aMT  | <0.05   |
|                                                | NLRP3 <sup>-/-</sup> EA vs NLRP3 <sup>-/-</sup> EA + aMT | <0.05   |
|                                                | NLRP3 <sup>-/-</sup> OA vs NLRP3 <sup>-/-</sup> OA + aMT | <0.05   |
| 12                                             | WT EA + aMT vs NLRP3 <sup>-/-</sup> EA + aMT             | <0.05   |
|                                                | WT OA +aMT vs NLRP3 <sup>-/-</sup> OA +aMT               | <0.05   |
|                                                |                                                          |         |
|                                                |                                                          |         |

Table S1.4. TRANSCRIPT: *Chrono*. Post-hoc test: Tukey multiple comparison of mean (continued)

| <i>Aging effect on WT</i> |            |         | <i>Genotype effect</i> |                                                    |         | <i>Melatonin effect on WT</i> |                |         | <i>Melatonin effect on NLRP3<sup>-/-</sup></i> |                                                          |         |
|---------------------------|------------|---------|------------------------|----------------------------------------------------|---------|-------------------------------|----------------|---------|------------------------------------------------|----------------------------------------------------------|---------|
| Hour                      | Comparison | P value | Hour                   | Comparison                                         | P value | Hour                          | Comparison     | P value | Hour                                           | Comparison                                               | P value |
|                           |            |         | 18                     | NLRP3 <sup>-/-</sup> Y vs NLRP3 <sup>-/-</sup> OA  | <0.05   | 18                            | OA vs OA + aMT | <0.05   | 18                                             | NLRP3 <sup>-/-</sup> Y vs NLRP3 <sup>-/-</sup> OA + aMT  | <0.05   |
|                           |            |         |                        | NLRP3 <sup>-/-</sup> EA vs NLRP3 <sup>-/-</sup> OA | <0.05   |                               |                |         |                                                | NLRP3 <sup>-/-</sup> OA vs NLRP3 <sup>-/-</sup> OA + aMT | <0.05   |
|                           |            |         |                        | WT Y vs NLRP3 <sup>-/-</sup> Y                     | <0.05   |                               |                |         |                                                | WT EA + aMT vs NLRP3 <sup>-/-</sup> EA + aMT             | <0.05   |
|                           |            |         |                        | WT EA vs NLRP3 <sup>-/-</sup> EA                   | <0.05   |                               |                |         |                                                | WT OA + aMT vs NLRP3 <sup>-/-</sup> OA + aMT             | <0.05   |
|                           |            |         |                        | WT OA vs NLRP3 <sup>-/-</sup> OA                   | <0.05   |                               |                |         |                                                |                                                          |         |

Table S1.5. TRANSCRIPT: *Rev-erba*. Post-hoc test: Tukey multiple comparison of mean

| <u><i>Aging effect on WT</i></u> |            |         | <u><i>Genotype effect</i></u> |                                                    |         | <u><i>Melatonin effect on WT</i></u> |                |         | <u><i>Melatonin effect on NLRP3<sup>-/-</sup></i></u> |                                                          |         |
|----------------------------------|------------|---------|-------------------------------|----------------------------------------------------|---------|--------------------------------------|----------------|---------|-------------------------------------------------------|----------------------------------------------------------|---------|
| Hour                             | Comparison | P value | Hour                          | Comparison                                         | P value | Hour                                 | Comparison     | P value | Hour                                                  | Comparison                                               | P value |
| 0                                | Y vs EA    | <0.05   | 0                             | NLRP3 <sup>-/-</sup> Y vs NLRP3 <sup>-/-</sup> EA  | <0.05   | 6                                    | Y vs EA + aMT  | <0.05   | 6                                                     | NLRP3 <sup>-/-</sup> Y vs NLRP3 <sup>-/-</sup> EA + aMT  | <0.05   |
|                                  | EA vs OA   | <0.05   |                               | NLRP3 <sup>-/-</sup> EA vs NLRP3 <sup>-/-</sup> OA | <0.05   |                                      | Y vs OA + aMT  | <0.05   |                                                       | NLRP3 <sup>-/-</sup> Y vs NLRP3 <sup>-/-</sup> OA + aMT  | <0.05   |
| 6                                | Y vs EA    | <0.05   | 6                             | NLRP3 <sup>-/-</sup> Y vs NLRP3 <sup>-/-</sup> EA  | <0.05   | 12                                   | Y vs EA + aMT  | <0.05   | 12                                                    | NLRP3 <sup>-/-</sup> Y vs NLRP3 <sup>-/-</sup> EA + aMT  | <0.05   |
|                                  | Y vs OA    | <0.05   |                               | NLRP3 <sup>-/-</sup> Y vs NLRP3 <sup>-/-</sup> OA  | <0.05   |                                      | Y vs OA + aMT  | <0.05   |                                                       | NLRP3 <sup>-/-</sup> Y vs NLRP3 <sup>-/-</sup> OA + aMT  | <0.05   |
| 12                               | Y vs EA    | <0.05   | 12                            | NLRP3 <sup>-/-</sup> Y vs NLRP3 <sup>-/-</sup> EA  | <0.05   |                                      | EA vs EA + aMT | <0.05   |                                                       | NLRP3 <sup>-/-</sup> EA vs NLRP3 <sup>-/-</sup> EA + aMT | <0.05   |
|                                  | Y vs OA    | <0.05   |                               | NLRP3 <sup>-/-</sup> Y vs NLRP3 <sup>-/-</sup> OA  | <0.05   |                                      | OA vs OA + aMT | <0.05   |                                                       | NLRP3 <sup>-/-</sup> OA vs NLRP3 <sup>-/-</sup> OA + aMT | <0.05   |
|                                  | EA vs OA   | <0.05   |                               | NLRP3 <sup>-/-</sup> EA vs NLRP3 <sup>-/-</sup> OA | <0.05   | 18                                   | Y vs EA + aMT  | <0.05   | 18                                                    | NLRP3 <sup>-/-</sup> Y vs NLRP3 <sup>-/-</sup> EA + aMT  | <0.05   |
|                                  |            |         |                               |                                                    |         |                                      | Y vs OA + aMT  | <0.05   |                                                       | NLRP3 <sup>-/-</sup> Y vs NLRP3 <sup>-/-</sup> OA + aMT  | <0.05   |
|                                  |            |         |                               |                                                    |         |                                      | EA vs EA + aMT | <0.05   |                                                       | NLRP3 <sup>-/-</sup> EA vs NLRP3 <sup>-/-</sup> EA + aMT | <0.05   |

Table S1.6. TRANSCRIPT: *Rora*. Post-hoc test: Tukey multiple comparison of mean

| <u>Aging effect on WT</u> |            |         | <u>Genotype effect</u> |                                                    |         | <u>Melatonin effect on WT</u> |                |         | <u>Melatonin effect on <i>NLRP3</i><sup>-/-</sup></u> |                                                          |         |
|---------------------------|------------|---------|------------------------|----------------------------------------------------|---------|-------------------------------|----------------|---------|-------------------------------------------------------|----------------------------------------------------------|---------|
| Hour                      | Comparison | P value | Hour                   | Comparison                                         | P value | Hour                          | Comparison     | P value | Hour                                                  | Comparison                                               | P value |
| 0                         | Y vs OA    | <0.05   | 0                      | NLRP3 <sup>-/-</sup> Y vs NLRP3 <sup>-/-</sup> EA  | <0.05   | 0                             | Y vs EA + aMT  | <0.05   | 0                                                     | NLRP3 <sup>-/-</sup> Y vs NLRP3 <sup>-/-</sup> EA + aMT  | <0.05   |
| 6                         | Y vs OA    | <0.05   |                        | NLRP3 <sup>-/-</sup> Y vs NLRP3 <sup>-/-</sup> OA  | <0.05   |                               | OA vs OA + aMT | <0.05   |                                                       | NLRP3 <sup>-/-</sup> Y vs NLRP3 <sup>-/-</sup> OA + aMT  | <0.05   |
|                           | EA vs OA   | <0.05   |                        | WT Y vs NLRP3 <sup>-/-</sup> Y                     | <0.05   | 6                             | Y vs OA + aMT  | <0.05   | 6                                                     | NLRP3 <sup>-/-</sup> Y vs NLRP3 <sup>-/-</sup> EA + aMT  | <0.05   |
| 18                        | EA vs OA   | <0.05   | 6                      | NLRP3 <sup>-/-</sup> Y vs NLRP3 <sup>-/-</sup> EA  | <0.05   | 12                            | Y vs OA + aMT  | <0.05   |                                                       | NLRP3 <sup>-/-</sup> Y vs NLRP3 <sup>-/-</sup> OA + aMT  | <0.05   |
|                           |            |         |                        | NLRP3 <sup>-/-</sup> Y vs NLRP3 <sup>-/-</sup> OA  | <0.05   |                               | OA vs OA + aMT | <0.05   |                                                       | NLRP3 <sup>-/-</sup> EA vs NLRP3 <sup>-/-</sup> EA + aMT | <0.05   |
|                           |            |         |                        | NLRP3 <sup>-/-</sup> EA vs NLRP3 <sup>-/-</sup> OA | <0.05   | 18                            | Y vs EA + aMT  | <0.05   | 12                                                    | NLRP3 <sup>-/-</sup> EA vs NLRP3 <sup>-/-</sup> EA + aMT | <0.05   |
|                           |            |         |                        | WT Y vs NLRP3 <sup>-/-</sup> Y                     | <0.05   |                               | Y vs OA + aMT  | <0.05   |                                                       | NLRP3 <sup>-/-</sup> OA vs NLRP3 <sup>-/-</sup> OA + aMT | <0.05   |
|                           |            |         |                        | WT EA vs NLRP3 <sup>-/-</sup> EA                   | <0.05   |                               | EA vs EA + aMT | <0.05   |                                                       | WT OA + aMT vs NLRP3 <sup>-/-</sup> OA + aMT             | <0.05   |
|                           |            |         |                        | WT OA vs NLRP3 <sup>-/-</sup> OA                   | <0.05   |                               | OA vs OA + aMT | <0.05   | 18                                                    | NLRP3 <sup>-/-</sup> Y vs NLRP3 <sup>-/-</sup> EA + aMT  | <0.05   |
|                           |            |         | 12                     | NLRP3 <sup>-/-</sup> Y vs NLRP3 <sup>-/-</sup> EA  | <0.05   |                               |                |         |                                                       | NLRP3 <sup>-/-</sup> Y vs NLRP3 <sup>-/-</sup> OA + aMT  | <0.05   |
|                           |            |         |                        | NLRP3 <sup>-/-</sup> Y vs NLRP3 <sup>-/-</sup> OA  | <0.05   |                               |                |         |                                                       | NLRP3 <sup>-/-</sup> EA vs NLRP3 <sup>-/-</sup> EA + aMT | <0.05   |
|                           |            |         |                        | NLRP3 <sup>-/-</sup> EA vs NLRP3 <sup>-/-</sup> OA | <0.05   |                               |                |         |                                                       | WT EA + aMT vs NLRP3 <sup>-/-</sup> EA + aMT             | <0.05   |
|                           |            |         |                        | WT EA vs NLRP3 <sup>-/-</sup> EA                   | <0.05   |                               |                |         |                                                       | WT OA + aMT vs NLRP3 <sup>-/-</sup> OA + aMT             | <0.05   |
|                           |            |         | 18                     | NLRP3 <sup>-/-</sup> Y vs NLRP3 <sup>-/-</sup> OA  | <0.05   |                               |                |         |                                                       |                                                          |         |
|                           |            |         |                        | NLRP3 <sup>-/-</sup> EA vs NLRP3 <sup>-/-</sup> OA | <0.05   |                               |                |         |                                                       |                                                          |         |
|                           |            |         |                        | WT Y vs NLRP3 <sup>-/-</sup> Y                     | <0.05   |                               |                |         |                                                       |                                                          |         |
|                           |            |         |                        | WT EA vs NLRP3 <sup>-/-</sup> EA                   | <0.05   |                               |                |         |                                                       |                                                          |         |
