# Supplementary material for: Age and Chronodisruption in Mouse Heart: Effect of the NLRP3 Inflammasome and Melatonin Therapy
Source: MDPI journal article supplement (doi:10.3390/ijms23126846), 2022-06-20
Supplement: s1 [file s1]

**Supplementary Table S3.** List of primers used in RT-PCR assay.

| Gene Symbol                     | Gene Description                                                              | Forward primer          | Reverse primer          |
|---------------------------------|-------------------------------------------------------------------------------|-------------------------|-------------------------|
| <i>Clock</i>                    | Circadian Locomotor Output Cycles Kaput                                       | GGTGGTGACTGCCTAT CCTAC  | CTGCTGTTGTTGTTGC TGTTG  |
| <i>Bmal1</i>                    | Brain and muscle ARNT (aryl hydrocarbon receptor nuclear translocator)-like 1 | GAAGACAATGAGCCA GACAAC  | CCATAGATTTCACCCG TATTTC |
| <i>Per2</i>                     | Period circadian clock 2                                                      | ATCTATCTGTGCTGCT GGTC   | ACTGGTGATGTCTCGT TCC    |
| <i>Chrono</i>                   | Circadian associated repressor of transcription                               | GCATTGGTGTCATCCT TGTC   | TTAGTCATCTCTCTGT CTGTGG |
| <i>Rev-erba</i>                 | Reverse strand of protein ERB alpha                                           | ACACACTCTCTGCTCT TC     | GACCTTGACACAAAC TGG     |
| <i>Rora</i>                     | Retinoic acid-related orphan receptor alpha                                   | AGGTGGTGTTTATTAG GATGTG | TCTTCTCGGTGGTTCT TCT    |
| <i><math>\beta</math>-actin</i> | Beta-actin                                                                    | GCTGTCCCTGTATGCC TCTG   | CGCTCGTTGCCAATAG TGATG  |
