# Supplementary material for: Age and Chronodisruption in Mouse Heart: Effect of the NLRP3 Inflammasome and Melatonin Therapy
Source: MDPI journal article supplement (doi:10.3390/ijms23126846), 2022-06-20
Supplement: s1 [file s1]

**Supplementary Table S2.** Cosinor analysis of clock gene expression in heart of WT and NLRP3<sup>-/-</sup> mice during aging and melatonin treatment.

| Group                     | Gene            | P-value | PR    | Acrophase<br>(95% CI)    | Amplitude<br>(95% CI)    | Mesor<br>(95% CI)        |
|---------------------------|-----------------|---------|-------|--------------------------|--------------------------|--------------------------|
| WT<br>Y                   | <i>Clock</i>    | < 0.001 | 83,31 | 7.53<br>(6.21 – 8.87)    | 20<br>(13.30 - 26.80)    | 69.2<br>(64.50 - 74)     |
|                           | <i>Bmal1</i>    | < 0.001 | 73,48 | 7.67<br>(6.62 – 8.87)    | 28.60<br>(20.80 – 36.40) | 50.80<br>(45.30 – 56.30) |
|                           | <i>Per2</i>     | < 0.01  | 35,83 | 19.87<br>(17.40 – 22.40) | 10.40<br>(4.07 – 16.30)  | 45.60<br>(41.20 – 50.10) |
|                           | <i>Chrono</i>   | < 0.05  | 63,17 | 19.67<br>(17.33 - 22)    | 8.96<br>(3.80 – 14.10)   | 22.10<br>(18.40 – 25.70) |
|                           | <i>Rev-erba</i> | < 0.001 | 65,24 | 16.73<br>(15.47 - 18)    | 27.20<br>(18.20 – 36.20) | 21.70<br>(15.30 – 28.10) |
|                           | <i>Rora</i>     | < 0.001 | 83,25 | 13.33<br>(12.47 -14.20)  | 15.50<br>(12 – 19.10)    | 53.20<br>(50.70 – 55.70) |
| NLRP3 <sup>-/-</sup><br>Y | <i>Clock</i>    | < 0.05  | 48,22 | 7.80<br>(5.26 – 10.40)   | 7.60<br>(2.80 – 12.30)   | 55.90<br>(52.50 – 59.20) |
|                           | <i>Bmal1</i>    | < 0.01  | 43,63 | 7.93<br>(5.84 - 10)      | 17.30<br>(8.37 – 26.20)  | 30.50<br>(24.20 – 36.90) |
|                           | <i>Per2</i>     | < 0.05  | 58,63 | 12.47<br>(9.87 – 15.13)  | 19.70<br>(7.20 – 32.10)  | 53.80<br>(45 – 62.70)    |
|                           | <i>Chrono</i>   | < 0.001 | 81,06 | 17.73<br>(16.87 – 18.53) | 34.90<br>(27.20 – 42.50) | 45.80<br>(40.40 – 51.30) |
|                           | <i>Rev-erba</i> | < 0.001 | 72,8  | 17.40<br>(16.33 – 18.47) | 35.70<br>(25.80 – 45.70) | 28.40<br>(21.40 – 35.40) |
|                           | <i>Rora</i>     | < 0.05  | 58,83 | 18.01<br>(15.47 – 20.67) | 26.50<br>(9.79 – 43.30)  | 74.30<br>(62.40 – 86.10) |
| WT<br>EA                  | <i>Clock</i>    | < 0.01  | 37,08 | 12.20<br>(9.80 – 14.60)  | 14.70<br>(6.03 – 23.50)  | 60.60<br>(54.50 – 66.80) |
|                           | <i>Bmal1</i>    | < 0.001 | 72,58 | 10.87<br>(9.80 - 11.93)  | 34.90<br>(25.20 – 44.70) | 26.90<br>(20 – 33.80)    |
|                           | <i>Per2</i>     | < 0.05  | 61,46 | 21.33<br>(18.87 – 23.73) | 23.80<br>(9.58 - 38)     | 58.70<br>(48.60 – 68.70) |
|                           | <i>Chrono</i>   | < 0.001 | 86,97 | 17.27                    | 14.80                    | 22.70                    |

|                                         |                 |         |       |                          |                          |                          |
|-----------------------------------------|-----------------|---------|-------|--------------------------|--------------------------|--------------------------|
|                                         |                 |         |       | (16.60 - 17.93)          | (12.20 – 17.40)          | (20.90 – 24.50)          |
|                                         | <i>Rev-erba</i> | < 0.001 | 80,37 | 16.07<br>(15.20 - 16.93) | 24.40<br>(18.90 – 29.80) | 30.80<br>(26.90 – 34.60) |
|                                         | <i>Rora</i>     | ns      | 23,86 | 13.80<br>(10.20 – 17.40) | 13.20<br>(2.49 – 23.90)  | 54.50<br>(47 – 62.10)    |
| <b>NLRP3<sup>-/-</sup><br/>EA</b>       | <i>Clock</i>    | < 0.001 | 80,06 | 10.87<br>(10 - 11.73)    | 29.80<br>(23 – 36.50)    | 67.60<br>(62.90 – 72.40) |
|                                         | <i>Bmal1</i>    | < 0.001 | 74,63 | 8.80<br>(7.73 – 9.80)    | 26.50<br>(19.50 – 33.50) | 24.70<br>(19.80 – 29.70) |
|                                         | <i>Per2</i>     | < 0.001 | 52,92 | 11.13<br>(9.47 – 12.80)  | 12.80<br>(7.32 – 18.30)  | 56.10<br>(52.20 – 59.90) |
|                                         | <i>Chrono</i>   | < 0.001 | 65,24 | 17.73<br>(16.47 – 19.07) | 34.90<br>(23.30 – 46.50) | 24.60<br>(16.50 – 32.80) |
|                                         | <i>Rev-erba</i> | < 0.001 | 95,62 | 15.07<br>(14.67 – 15.40) | 43.60<br>(39.40 – 47.90) | 36.90<br>(33.90 – 39.90) |
|                                         | <i>Rora</i>     | ns      | 3,03  | 19.40<br>(16.27 – 22.53) | 4.28<br>(-6.71 – 15.30)  | 56.80<br>(49 – 64.60)    |
| <b>WT<br/>EA + aMT</b>                  | <i>Clock</i>    | < 0.001 | 78,5  | 7.27<br>(6.34 – 8.20)    | 29.50<br>(22.50 – 36.50) | 50.90<br>(45.90 – 55.90) |
|                                         | <i>Bmal1</i>    | < 0.001 | 96,16 | 9.33<br>(8.93 – 9.67)    | 28.90<br>(26.30 -31.60)  | 22.70<br>(20.80 – 24.50) |
|                                         | <i>Per2</i>     | < 0.01  | 43,64 | 6.65<br>(4.58 – 8.73)    | 15.50<br>(7.50 – 23.50)  | 47.60<br>(41.90 – 53.30) |
|                                         | <i>Chrono</i>   | < 0.001 | 77,88 | 20.60<br>(19.67 – 21.53) | 4.73<br>(3.59 – 5.87)    | 9.55<br>(8.74 – 10.40)   |
|                                         | <i>Rev-erba</i> | < 0.001 | 67,33 | 12.13<br>(10.93 – 13.40) | 40.40<br>(27.60 – 53.10) | 31.50<br>(22.50 – 40.60) |
|                                         | <i>Rora</i>     | < 0.05  | 54,57 | 6.63<br>(3.73 – 9.53)    | 23<br>(7.17 – 38.80)     | 45<br>(33.80 – 56.20)    |
| <b>NLRP3<sup>-/-</sup><br/>EA + aMT</b> | <i>Clock</i>    | < 0.01  | 46,18 | 6.48<br>(4.53 – 8.47)    | 13.90<br>(7.10 – 20.80)  | 68.80<br>(64 – 73.70)    |
|                                         | <i>Bmal1</i>    | < 0.001 | 95,65 | 7.40<br>(7 - 7.73)       | 17.30<br>(15.60 - 19)    | 19.70<br>(18.50 – 20.90) |
|                                         | <i>Per2</i>     | < 0.05  | 41,03 | 10.80<br>(7.80 – 13.87)  | 12.30<br>(3.47 – 21.20)  | 60.90<br>(54.70 – 67.20) |
|                                         | <i>Chrono</i>   | < 0.001 | 66,5  | 18.27                    | 32.10                    | 22.80                    |

|                                   |                 |         |       |                          |                          |                          |
|-----------------------------------|-----------------|---------|-------|--------------------------|--------------------------|--------------------------|
|                                   |                 |         |       | (17 – 19.53)             | (21.80 – 42.50)          | (15.50 – 30.10)          |
|                                   | <i>Rev-erba</i> | < 0.001 | 90,93 | 15.60<br>(15 – 16.13)    | 40.20<br>(34.40 – 45.90) | 36.60<br>(32.50 – 40.70) |
|                                   | <i>Rora</i>     | < 0.05  | 40,9  | 13.13<br>(10.07 – 16.20) | 9.46<br>(2.65 – 16.30)   | 56.60<br>(51.70 – 61.40) |
| <b>WT<br/>OA</b>                  | <i>Clock</i>    | < 0.01  | 46,41 | 11.40<br>(9.40 – 13.33)  | 13.10<br>(6.73 – 19.50)  | 41.90<br>(37.40 – 46.50) |
|                                   | <i>Bmal1</i>    | < 0.001 | 86,62 | 9.13<br>(8.40 - 9.80)    | 37<br>(30.40 – 43.60)    | 30.20<br>(25.50 – 34.90) |
|                                   | <i>Per2</i>     | ns      | 20,98 | 20.93<br>(16.80 – 25.07) | 6.01<br>(0.72 – 11.30)   | 35<br>(31.20 – 38.70)    |
|                                   | <i>Chrono</i>   | < 0.001 | 73,24 | 18.67<br>(17.60 – 19.73) | 42.20<br>(30.70 – 53.80) | 29.60<br>(21.40 – 37.80) |
|                                   | <i>Rev-erba</i> | < 0.001 | 77,94 | 15.73<br>(14.80 – 16.67) | 21<br>(16 – 26.10)       | 24.50<br>(20.90 - 28)    |
|                                   | <i>Rora</i>     | ns      | 1,35  | 16<br>(12.93 – 19.07)    | 2.76<br>(-7.94 – 13.40)  | 65.60<br>(58 – 73.20)    |
| <b>NLRP3<sup>-/-</sup><br/>OA</b> | <i>Clock</i>    | < 0.001 | 67,88 | 10.40<br>(9.20 – 11.60)  | 22.30<br>(15.40 – 29.30) | 40.60<br>(35.60 – 45.50) |
|                                   | <i>Bmal1</i>    | < 0.001 | 83,88 | 9.80<br>(9 – 10.53)      | 41<br>(32.80 – 49.10)    | 32.70<br>(26.90 – 38.40) |
|                                   | <i>Per2</i>     | < 0.001 | 78,38 | 10.47<br>(9.53 – 11.33)  | 19.30<br>(14.70 – 23.90) | 37.70<br>(34.50 - 41)    |
|                                   | <i>Chrono</i>   | < 0.001 | 55,85 | 17.47<br>(15.87 – 19.07) | 13<br>(7.74 – 18.20)     | 13.60<br>(9.86 – 17.30)  |
|                                   | <i>Rev-erba</i> | < 0.001 | 70,96 | 16<br>(14.87 – 17.13)    | 25.40<br>(18 – 32.80)    | 22.40<br>(17.20 – 27.60) |
|                                   | <i>Rora</i>     | ns      | 28,59 | 15.27<br>(11.20 – 19.40) | 3.43<br>(-0.66 – 7.53)   | 51.70<br>(48.80 – 54.60) |
| <b>WT<br/>OA + aMT</b>            | <i>Clock</i>    | < 0.01  | 38,43 | 7<br>(4.66 – 9.33)       | 9.11<br>(3.80 – 14.30)   | 36.20<br>(32.50 – 39.90) |
|                                   | <i>Bmal1</i>    | < 0.001 | 81,19 | 8.40<br>(7.53 – 9.27)    | 22.20<br>(17.40 – 27.10) | 22<br>(18.60 – 25.40)    |
|                                   | <i>Per2</i>     | < 0.001 | 50,67 | 4.63<br>(2.86 – 6.41)    | 13.50<br>(7.45 – 19.50)  | 36.50<br>(32.30 – 40.80) |
|                                   | <i>Chrono</i>   | < 0.001 | 66,99 | 19.80                    | 7                        | 10.70                    |

|                                         |                 |         |       |                          |                          |                          |
|-----------------------------------------|-----------------|---------|-------|--------------------------|--------------------------|--------------------------|
|                                         |                 |         |       | (18.40 – 21.20)          | (4.48 – 9.51)            | (8.92 – 12.50)           |
|                                         | <i>Rev-erba</i> | < 0.001 | 93,08 | 13.93<br>(13.27 - 14.53) | 16.40<br>(13.70 - 19)    | 20.60<br>(18.70 – 22.50) |
|                                         | <i>Rora</i>     | < 0.001 | 79,2  | 6.01<br>(4.49 – 7.53)    | 22.80<br>(14 – 31.60)    | 36.30<br>(30.10 – 42.60) |
| <b>NLRP3<sup>-/-</sup><br/>OA + aMT</b> | <i>Clock</i>    | < 0.01  | 41,73 | 7.53<br>(5.37 – 9.67)    | 20.50<br>(9.25 – 31.50)  | 42.30<br>(34.50 – 50.10) |
|                                         | <i>Bmal1</i>    | < 0.001 | 86,25 | 7.40<br>(6.67 – 8.07)    | 16.10<br>(13.20 - 19)    | 15<br>(13 – 17.10)       |
|                                         | <i>Per2</i>     | < 0.001 | 64,39 | 12.60<br>(11.33 – 13.93) | 28.80<br>(19.10 – 38.50) | 51.30<br>(44.40 – 58.20) |
|                                         | <i>Chrono</i>   | < 0.001 | 86,27 | 16.01<br>(15.13 - 17)    | 28.10<br>(21.40 – 34.80) | 26<br>(21.30 – 30.80)    |
|                                         | <i>Rev-erba</i> | < 0.001 | 84,81 | 14.33<br>(13.60 – 15.07) | 41.90<br>(33.80 – 49.90) | 35.60<br>(29.90 – 41.30) |
|                                         | <i>Rora</i>     | < 0.001 | 82,95 | 11.20<br>(9.87 - 12.53)  | 31.10<br>(20.50 – 41.80) | 60.80<br>(53.30 – 68.40) |

<sup>a</sup>PR: percentage of rhythm; <sup>b</sup>CI: confidence interval
